# Supplementary material for: Total water levels along the South Atlantic Bight during three along-shelf propagating tropical cyclones: relative contributions of storm surge and wave runup
Source: Copernicus journal article supplement (doi:10.5194/nhess-2023-49), 2023-04-03

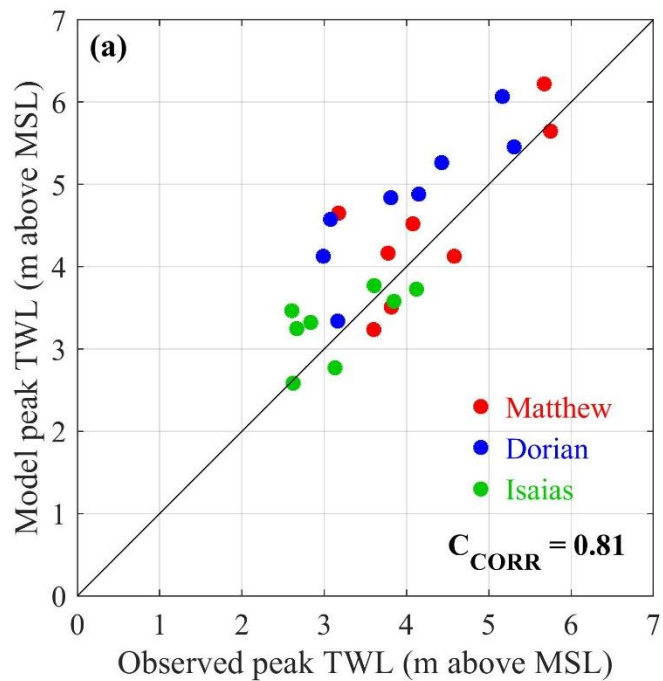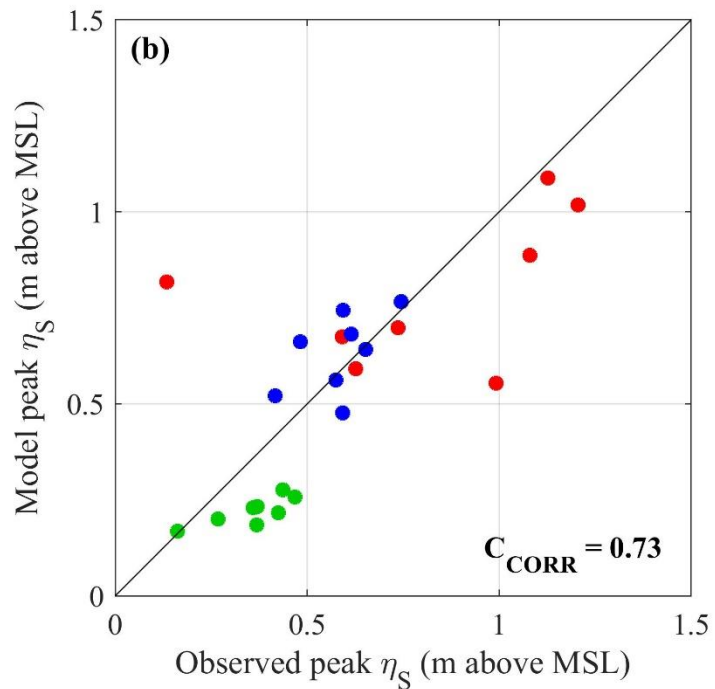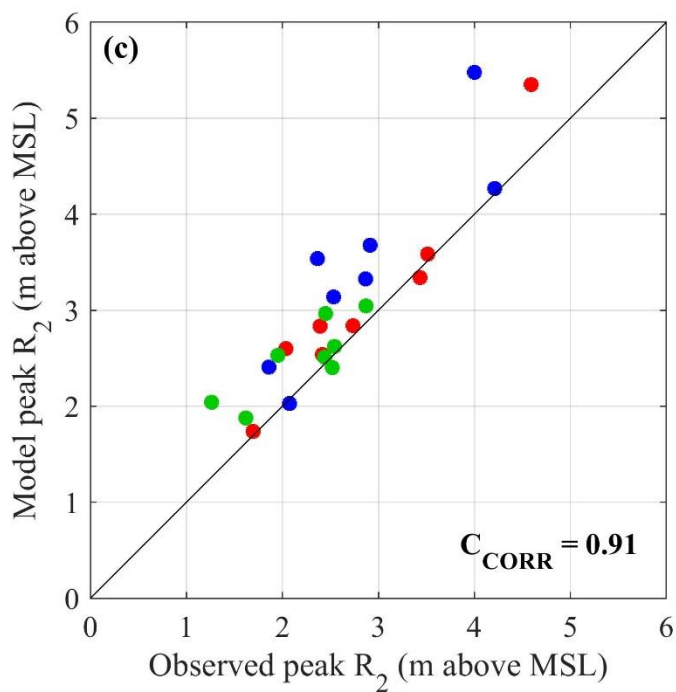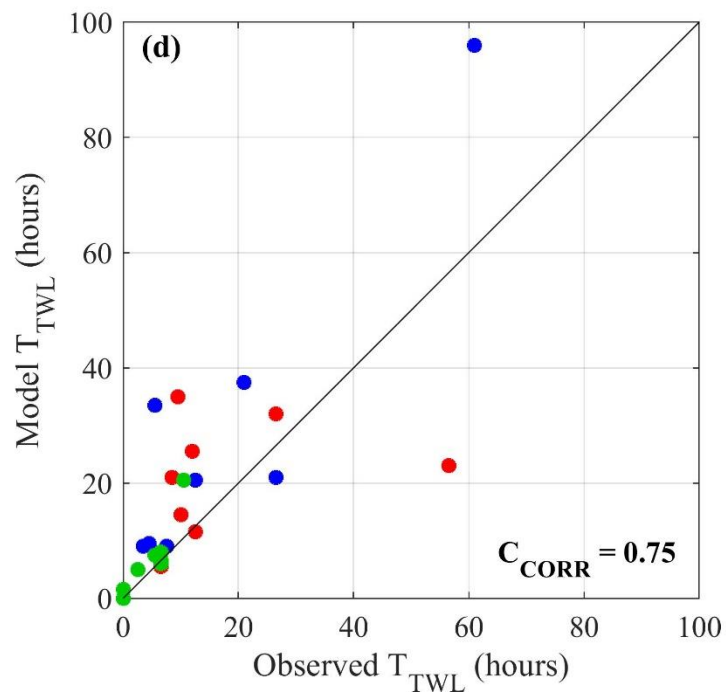

Supplement: Supplementary file [file nhess-2023-49-AC4-supplement.pdf]
